# Supplementary material
Source: Royal Society of Chemistry journal article supplement (doi:10.1039/d6tc00755d)
Supplement: d6tc00755d1.pdf [file d6tc00755d1.pdf]

## Supplementary information file

### Multimodal Luminescence in $\text{Ca}_2\text{Ga}_2\text{GeO}_7:\text{Er}^{3+}, \text{Yb}^{3+}$ Phosphors for Optical Thermometry and Anti-Counterfeiting Applications

Reshmi Thekke Parayil<sup>1,2†</sup>, Arsha P.<sup>3†</sup>, K. N. Chethana<sup>4</sup>, G.D. Patra,<sup>2,5</sup> Jitendra Bahadur,<sup>2,6</sup> M. Mohapatra<sup>1,2</sup>, Boddu S. Naidu<sup>3\*</sup>, Santosh K. Gupta<sup>1,2\*</sup>

<sup>1</sup>Radiochemistry Division, Bhabha Atomic Research Centre (BARC), Mumbai 400085, India

<sup>2</sup>Homi Bhabha National Institute (HBNI), Department of Atomic Energy, Anushaktinagar, Mumbai 400094, India

<sup>3</sup>Energy and Environment Unit, Institute of Nano Science and Technology (INST), Mohali, Punjab 140306, India

<sup>4</sup>The Yenepoya Institute of Arts, Science, Commerce and Management, Yenepoya (Deemed to be University), Balmatta, Mangaluru 57500, India

<sup>5</sup>Technical Physics Division, Bhabha Atomic Research Centre, Mumbai 400085, India

<sup>6</sup>Solid State Physics Division, Bhabha Atomic Research Centre, Mumbai 400085, India

**Author Notes:** † These authors contributed equally to this work.

\* **Corresponding authors:** [naidu245@gmail.com](mailto:naidu245@gmail.com) (BSN), [santoshg@barc.gov.in](mailto:santoshg@barc.gov.in) (SKG)

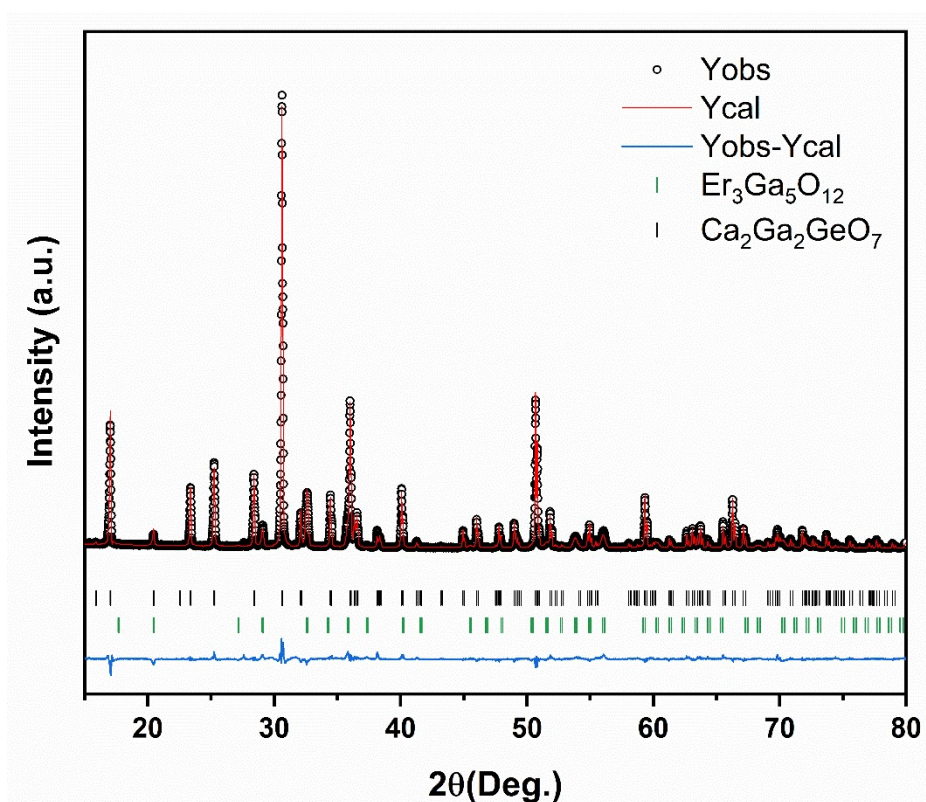

Figure S1: Rietveld plot for CGGO-5Er, 5Yb and fitting parameters of  $\chi^2 = 1.52$ ,  $R_p = 6.2\%$   $R_{wp} = 8.27\%$

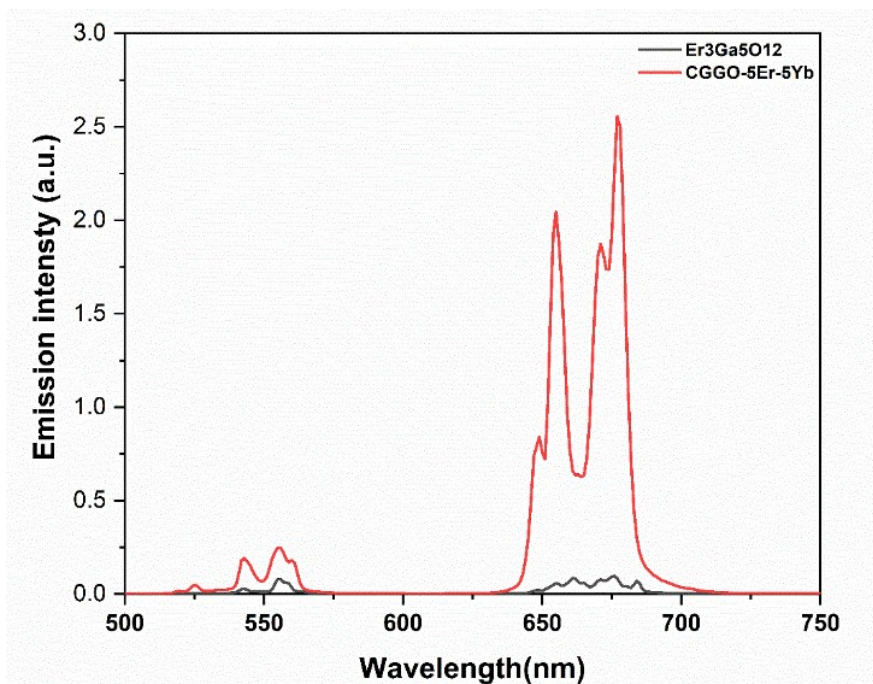

Figure S2: Emission spectra of CGGO-5Er,5Yb and  $\text{Er}_3\text{Ga}_5\text{O}_{12}$ .

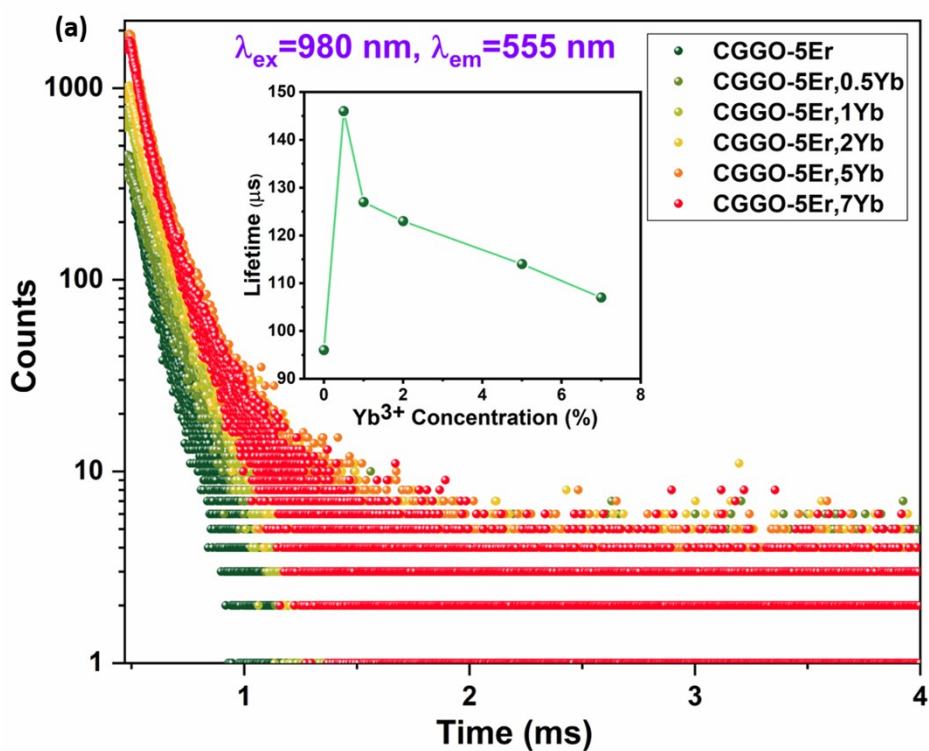

Figure S3: (a) Upconversion (UC) decay profile of CGGO-5Er, xYb phosphors monitored at an emission wavelength of 555 nm under 980 nm excitation.

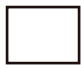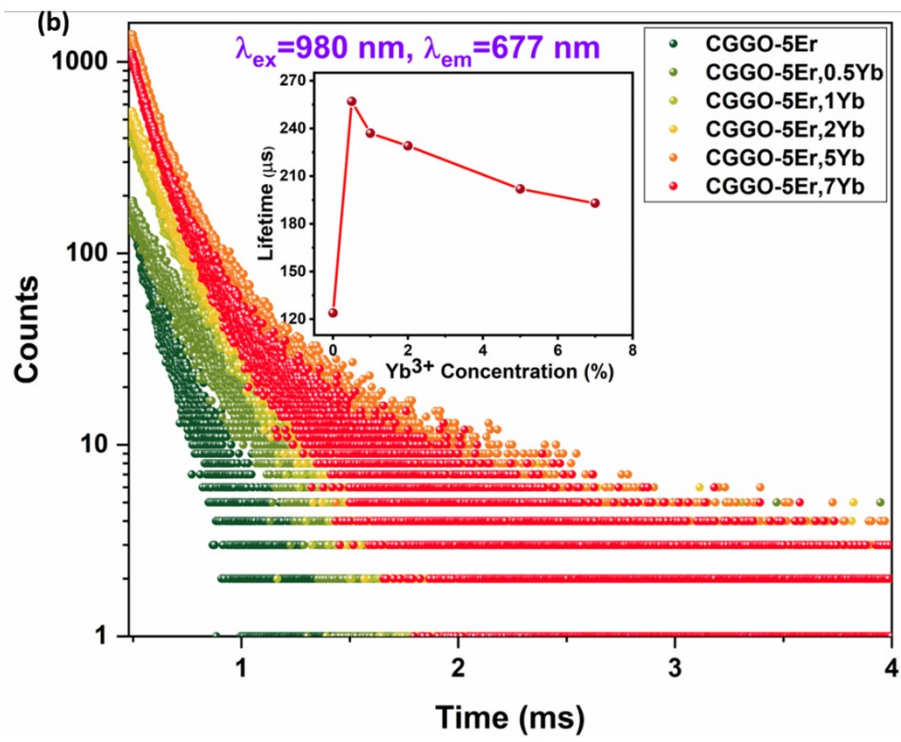

Figure S4: (a) Upconversion decay profile of CGGO-5Er, xYb phosphors monitored at an emission wavelength of 677 nm under 980 nm excitation.

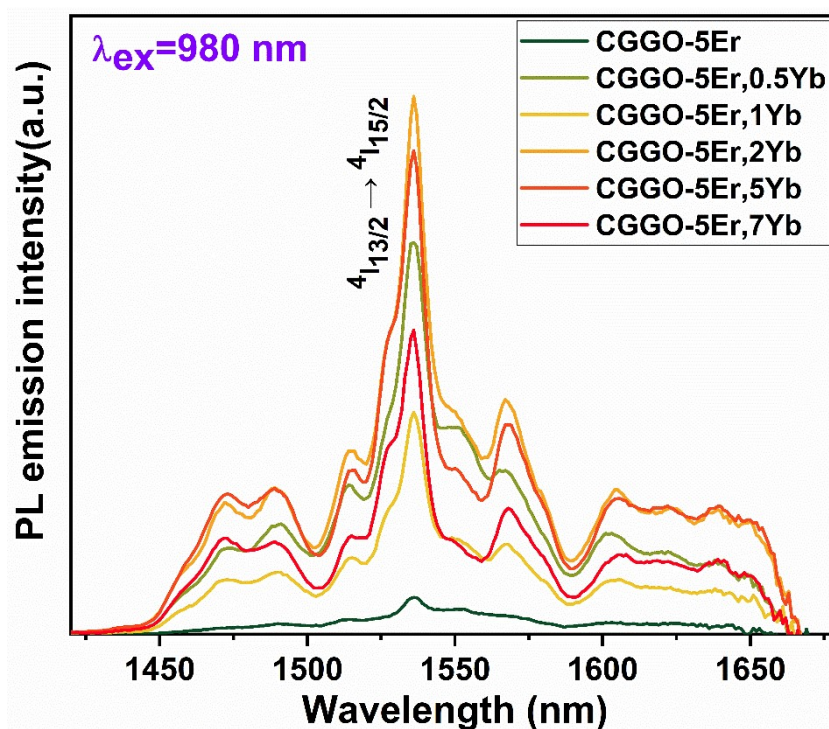

Figure S5: Emission spectra of CGGO-5Er, xYb phosphors in the NIR region under an excitation wavelength of 980 nm.

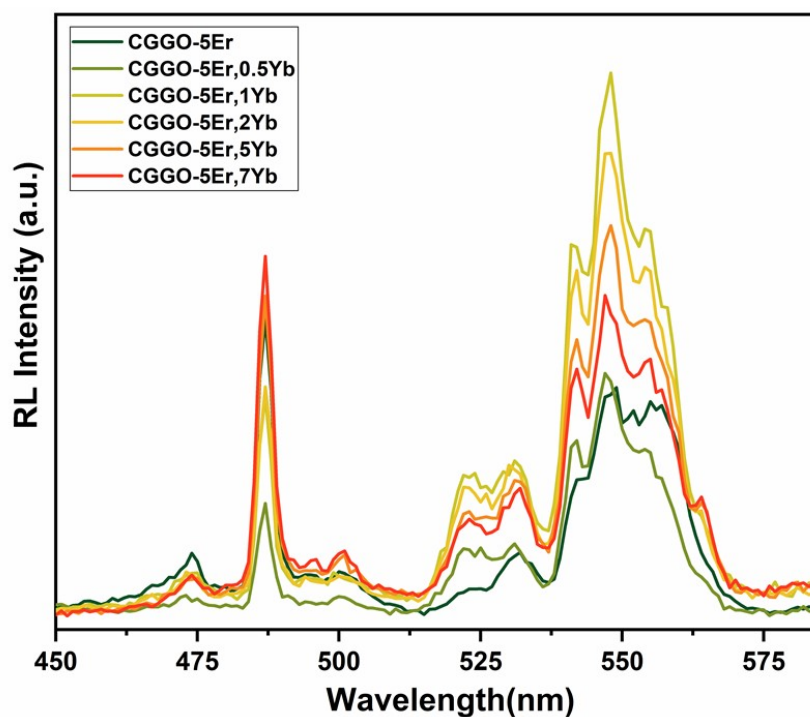

Figure S6: X-ray excited emission (radioluminescence) spectra of CGGO-5Er, xYb phosphors.

**Table S1: Upconversion quantum yield of reported UC phosphors**

| UC Phosphor                                                                 | $\lambda_{ex}$ (nm) | Upconversion quantum yield | Reference |
|-----------------------------------------------------------------------------|---------------------|----------------------------|-----------|
| $\text{La}_2\text{O}_3:2\%\text{Yb}^{3+}, 1\%\text{Er}^{3+}$                | 980                 | 3.8%                       | 1         |
| $\text{NaYF}_4: 2\%\text{Er}^{3+}, 18\%\text{Yb}^{3+}$<br>@ $\text{NaYF}_4$ | 976                 | 9%                         | 2         |
| $\text{NaYF}_4:2\%\text{Er}^{3+}, 20\% \text{Yb}^{3+}$                      | 976                 | 3%                         | 3         |
| $\text{YVO}_4: \text{Er}^{3+}, \text{Yb}^{3+}$                              | 970                 | 0.09%                      | 4         |
| $\text{Y}_3\text{NbO}_7:\text{Er}^{3+}/\text{Yb}^{3+}$                      | 980                 | 0.0020%                    | 5         |
| $\text{SrGd}_2\text{O}_4:0.5\%\text{Er}^{3+}, 5\% \text{Yb}^{3+}$           | 976                 | 0.055%                     | 6         |
| $\beta\text{-NaYF}_4: 3\%\text{Er}^{3+}, 17\%\text{Yb}^{3+}$                | 980                 | 10.5%                      | 7         |
| $\text{BaF}_2:2\%\text{Er}^{3+}, 3\%\text{Yb}^{3+},$                        | 976                 | 10%                        | 8         |
| $\text{La}_2\text{O}_2\text{S}:1\%\text{Er}^{3+}, 9\%\text{Yb}^{3+}$        | 977                 | 5.8%                       | 9         |
| $\text{Er}^{3+}/\text{Yb}^{3+}$ co-doped yttrium<br>tantalates              | 980                 | 0.016 %                    | 10        |

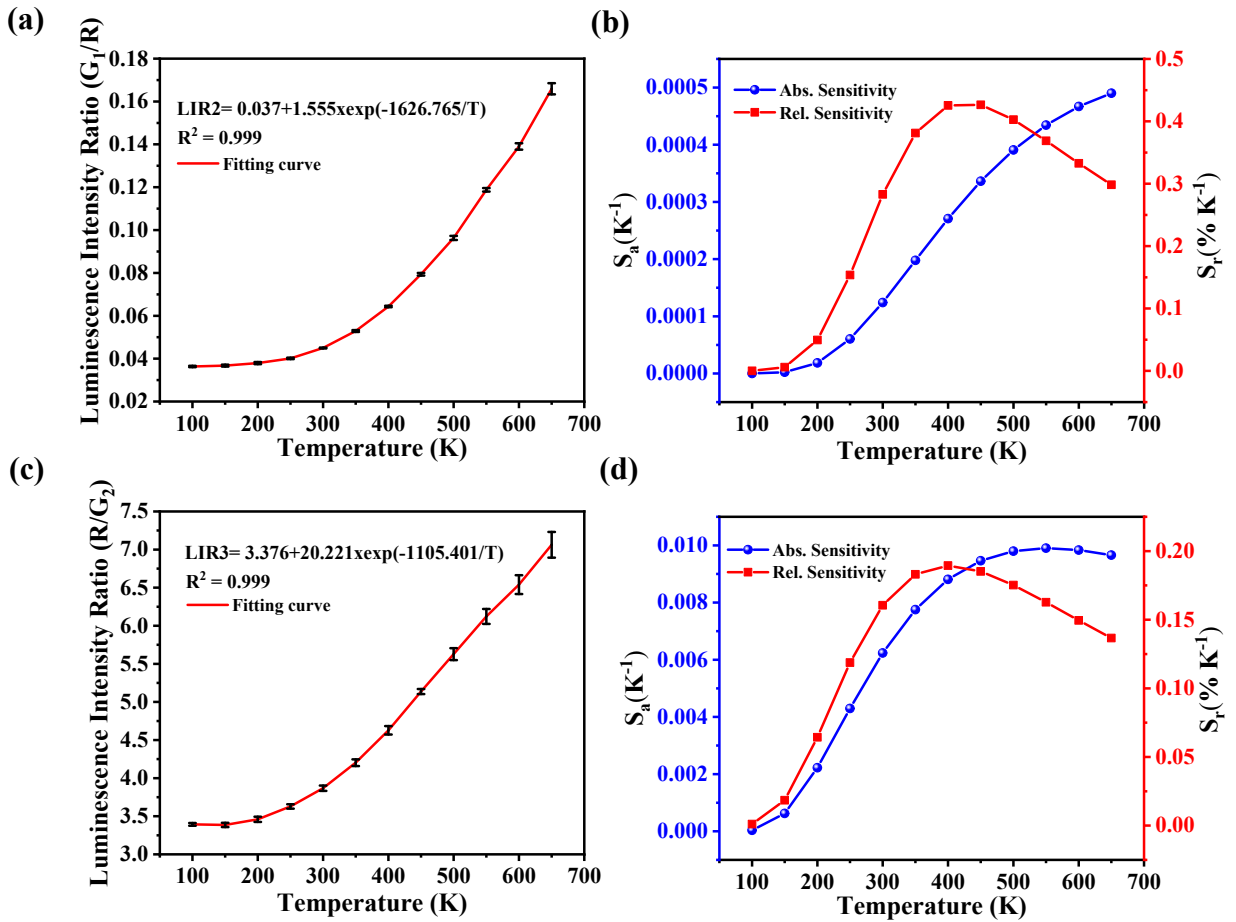

**Figure S7: (a) Variation of the luminescence intensity ratio ( $G_1/R$ ) with temperature with error bars, and (b) the corresponding absolute and relative sensitivities; (c) variation of the luminescence intensity ratio ( $R/G_2$ ) with temperature with error bars, and (d) the corresponding absolute and relative sensitivities.**

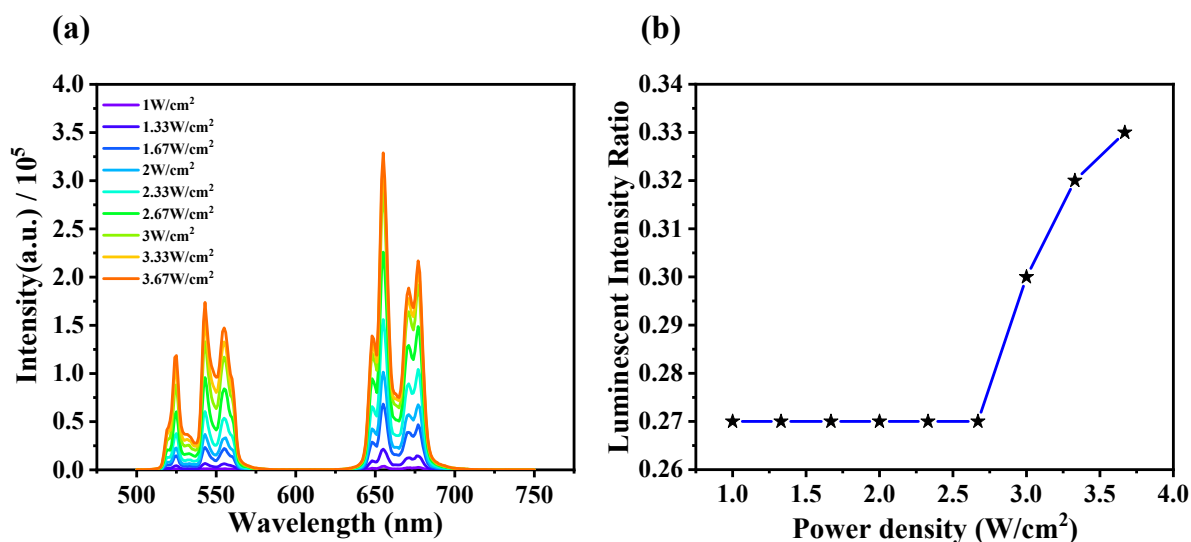

**Figure S8: (a) Upconversion luminescence (UCL) spectra of CGGO:5% Er<sup>3+</sup>, 5% Yb<sup>3+</sup> acquired at different excitation power densities; (b) Variation of luminescence intensity ratio (LIR) with excitation power density at a fixed temperature of 350 K, used to evaluate excitation power-dependent thermal effects.**

#### References

1. Gao, G.; Busko, D.; Kauffmann-Weiss, S.; Turshatov, A.; Howard, I. A.; Richards, B. S., Finely-tuned NIR-to-visible up-conversion in La<sub>2</sub>O<sub>3</sub>:Yb<sup>3+</sup>,Er<sup>3+</sup> microcrystals with high quantum yield. *Journal of Materials Chemistry C* **2017**, *5*, 11010-11017.
2. Homann, C.; Krukewitt, L.; Frenzel, F.; Grauel, B.; Würth, C.; Resch-Genger, U.; Haase, M., NaYF<sub>4</sub>:Yb,Er/NaYF<sub>4</sub> core/shell nanocrystals with high upconversion luminescence quantum yield. *Angewandte Chemie International Edition* **2018**, *57*, 8765-8769.
3. Boyer, J.-C.; van Veggel, F. C. J. M., Absolute quantum yield measurements of colloidal NaYF<sub>4</sub>: Er<sup>3+</sup>, Yb<sup>3+</sup> upconverting nanoparticles. *Nanoscale* **2010**, *2*, 1417-1419.
4. Mialon, G.; Türkcan, S.; Dantelle, G.; Collins, D. P.; Hadjipanayi, M.; Taylor, R. A.; Gacoin, T.; Alexandrou, A.; Boilot, J.-P., High up-conversion efficiency of YVO<sub>4</sub>:Yb,Er nanoparticles in water down to the single-particle level. *The Journal of Physical Chemistry C* **2010**, *114*, 22449-22454.
5. Borges, F. H.; Martins, J. C.; Caixeta, F. J.; Carlos, L. D.; Ferreira, R. A. S.; Gonçalves, R. R., Luminescent thermometry based on Er<sup>3+</sup>/Yb<sup>3+</sup> co-doped yttrium niobate with high NIR emission and NIR-to-visible upconversion quantum yields. *Journal of Luminescence* **2022**, *248*, 118986.
6. Stamenković, T.; Radmilović, N.; Prekajski Đorđević, M.; Rabasović, M.; Dinić, I.; Tomić, M.; Lojpur, V.; Mančić, L., Quantum yield and energy transfer in up-conversion SrGd<sub>2</sub>O<sub>4</sub>:Yb, Er nanoparticles obtained via sol-gel assisted combustion. *Journal of Luminescence* **2023**, *253*, 119491.
7. Kaiser, M.; Würth, C.; Kraft, M.; Hyppänen, I.; Soukka, T.; Resch-Genger, U., Power-dependent upconversion quantum yield of NaYF<sub>4</sub>:Yb<sup>3+</sup>,Er<sup>3+</sup> nano- and micrometer-sized particles – measurements and simulations. *Nanoscale* **2017**, *9*, 10051-10058.
8. Madirov, E. I.; Konyushkin, V. A.; Nakladov, A. N.; Fedorov, P. P.; Bergfeldt, T.; Busko, D.; Howard, I. A.; Richards, B. S.; Kuznetsov, S. V.; Turshatov, A., An up-conversion luminophore with high quantum yield and brightness based on BaF<sub>2</sub>:Yb<sup>3+</sup>,Er<sup>3+</sup> single crystals. *Journal of Materials Chemistry C* **2021**, *9*, 3493-3503.

9. Pokhrel, M.; Gangadharan, A. k.; Sardar, D. K., High upconversion quantum yield at low pump threshold in Er<sup>3+</sup>/Yb<sup>3+</sup> doped La<sub>2</sub>O<sub>2</sub>S phosphor. *Materials Letters* **2013**, *99*, 86-89.
10. Borges, F. H.; Martins, J. C.; Caixeta, F. J.; Pereira, R. R.; Carlos, L. D.; Ferreira, R. A. S.; Gonçalves, R. R., Primary thermometers based on sol–gel upconverting Er<sup>3+</sup>/Yb<sup>3+</sup> co-doped yttrium tantalates with high upconversion quantum yield and emission color tunability. *Journal of Sol-Gel Science and Technology* **2022**, *102*, 249-263.
